# Supplementary material
Source: publisher site journal article supplement (https://www.dovepress.com/article/405165)
Supplement: Supplementary file 1 [file get_supplementary_file.php]

Supplementary Information

Contents

[1.1 Comparison of ICD-9-CM and ICD-10-CM/PCS Terminologies 2](#_Toc102815471)

[1.2 Definition of Gastrointestinal Bleeding 3](#_Toc102815472)

[1.3 Density and Histogram Plots for Propensity Scores After Trimming in Various Data scenarios (B, C1, C2, C4) 4](#_Toc102815473)

[1.4 Role of Prevalence Filter in High-Dimensional Propensity Score Procedure 8](#_Toc102815474)

1.1 Comparison of ICD-9-CM and ICD-10-CM/PCS Terminologies

The Centers for Medicaid and Medicare Services and the Center for Disease Control and Prevention developed a U.S. version of the ICD-10 terminology. This new terminology went into effect in October 2015 in the U.S. healthcare system. The following table provides a contrast between this terminology and its predecessor (ICD-9-CM).

| **Differences between ICD-9-CM and ICD-10 Code Sets** | | |
| --- | --- | --- |
|  | ICD-9-CM | ICD-10-CM/PCS |
| **Diagnosis** | 14,025 codes | 69,823 codes |
| **Procedure** | 3,824 codes | 71,927 codes |
| **Structure Changes (selected details)** | | |
|  | ICD-9-CM | ICD-10-CM/PCS |
| **Diagnosis** | - 3-5 characters - 1st character is numeric or alpha - Character 2-5 are numeric | - 3-7 characters - 1st character is alpha - 2nd character is numeric - 3rd – 7th positions can be alpha or numeric |
| **Procedure** | - 3-4 characters - All characters are numeric - All codes have at least 3 characters | - 7 characters - Each can be alpha or numeric - Numbers 0-9; letters A-H, J-N, P-Z |

Adapted from “The ICD-10 Transition and Public Health Surveillance - What You Need to Know” available at <https://www.cdc.gov/nchs/icd/icd10cm_pcs_background.htm> (Accessed 31/03/2021)

1.2 Definition of Gastrointestinal Bleeding

This code algorithm was defined by the Food and Drug Administration (Sentinel Initiative) in a study to evaluate the safety of anticoagulant drugs.1

| **ICD era** | **Code Set** |
| --- | --- |
| **ICD-9-CM** | 455, 455.1, 455.2, 455.3, 455.4, 455.5, 455.6, 455.7, 455.8, 456, 456.2, 459, 530.1, 530.7, 530.82, 531, 531.01, 531.1, 531.2, 531.21, 531.3, 531.4, 531.41, 531.5, 531.6, 531.61, 531.7, 531.9, 532, 532.01, 532.1, 532.2, 532.21, 532.3, 532.4, 532.41, 532.5, 532.6, 532.61, 532.7, 532.9, 533, 533.01, 533.1, 533.2, 533.21, 533.3, 533.4, 533.41, 533.5, 533.6, 533.61, 533.7, 533.9, 534, 534.01, 534.1, 534.2, 534.21, 534.3, 534.4, 534.41, 534.5, 534.6, 534.61, 534.7, 534.9, 535, 535.01, 535.1, 535.11, 535.2, 535.21, 535.3, 535.31, 535.4, 535.41, 535.5, 535.51, 535.6, 535.61, 537.83, 562, 562.01, 562.02, 562.03, 562.1, 562.11, 562.12, 562.13, 568.81, 569.3, 569.85, 578, 578.1, 578.9 |
| **ICD-10-CM** | I85.01 ,I85.11 ,K22.6 ,K22.8 ,K25.0 ,K25.2 ,K25.4 ,K25.6 ,K26.0 ,K26.2 ,K26.4 ,K26.6 ,K27.0 ,K27.2 ,K27.4 ,K27.6 ,K28.0 ,K28.2 ,K28.4 ,K28.6 ,K29.00 ,K29.01 ,K29.20 ,K29.21 ,K29.30 ,K29.31 ,K29.40 ,K29.41 ,K29.50 ,K29.51 ,K29.60 ,K29.61 ,K29.70 ,K29.71 ,K29.80 ,K29.81 ,K29.90 ,K29.91 ,K31.811 ,K55.21 ,K56.699 ,K57.00 ,K57.01 ,K57.10 ,K57.11 ,K57.12 ,K57.13 ,K57.20 ,K57.21 ,K57.30 ,K57.31 ,K57.32 ,K57.33 ,K57.40 ,K57.41 ,K57.50 ,K57.51 ,K57.52 ,K57.53 ,K57.80 ,K57.81 ,K57.90 ,K57.91 ,K57.92 ,K57.93 ,K62.5 ,K64.0 ,K64.0 ,K64.1 ,K64.1 ,K64.2 ,K64.2 ,K64.3 ,K64.3 ,K64.4 ,K64.4 ,K64.5 ,K64.8 ,K64.8 ,K64.9 ,K66.1 ,K92.0 ,K92.1 ,K92.2 ,R58 |

U.S. Food and Drug Administration - Sentinel Initiative. Gastrointestinal Bleeding Algorithm Defined in "Thromboembolic Stroke, Intracranial Hemorrhage, Gastrointestinal Bleeding, and Major Extracranial Bleeding following Dabigatran, Rivaroxaban, and Apixaban Use in Patients with Atrial Fibrillation: A Propensity score matched analysis. Published online 2020. <https://www.sentinelinitiative.org/methods-data-tools/health-outcomes-interest/gastrointestinal-bleeding-algorithm-defined>

(Accessed 31/03/2021)

1.3 Density and Histogram Plots for Propensity Scores After Trimming in Various Data scenarios (B, C1, C2, C4)


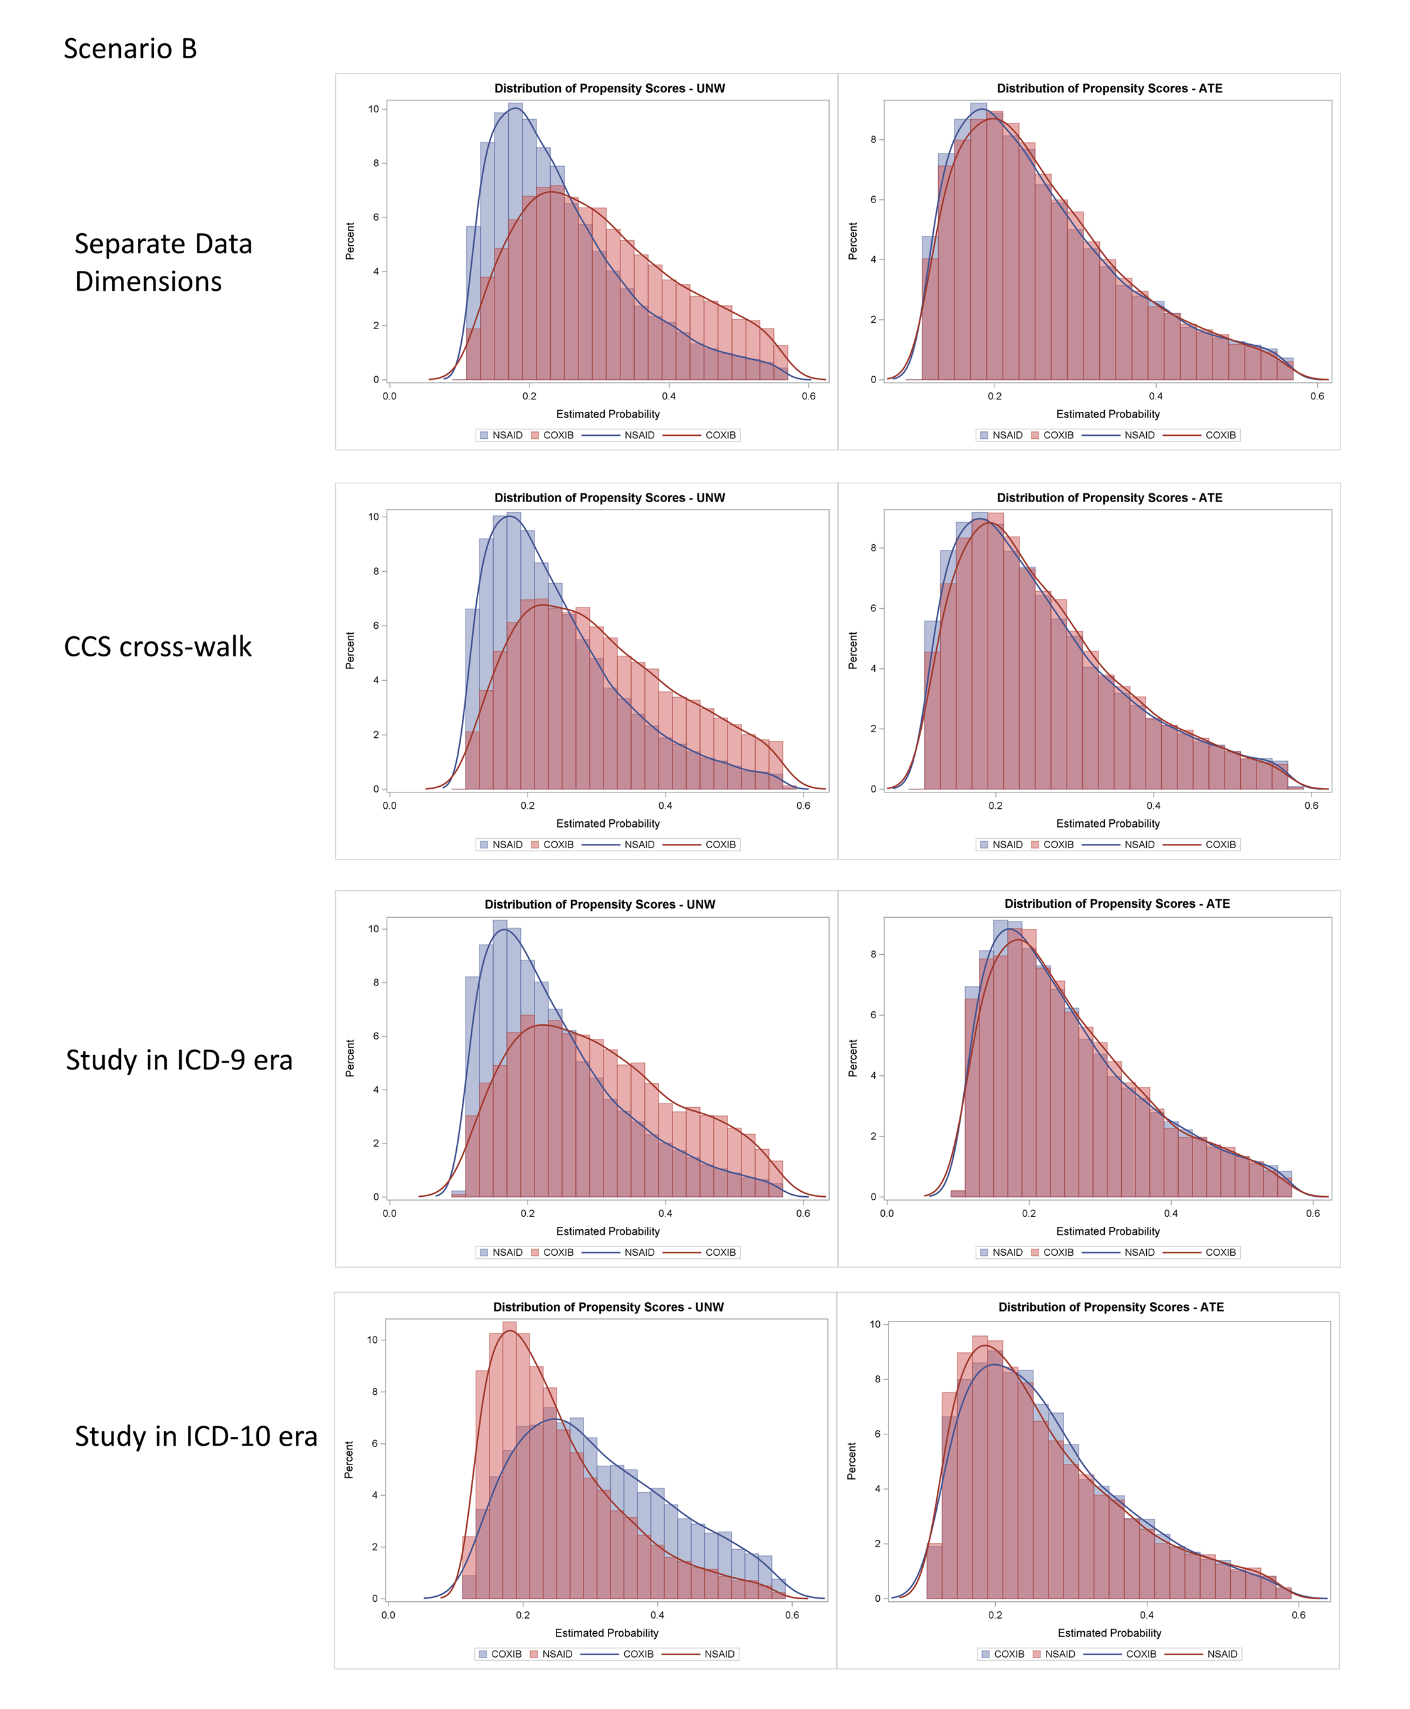


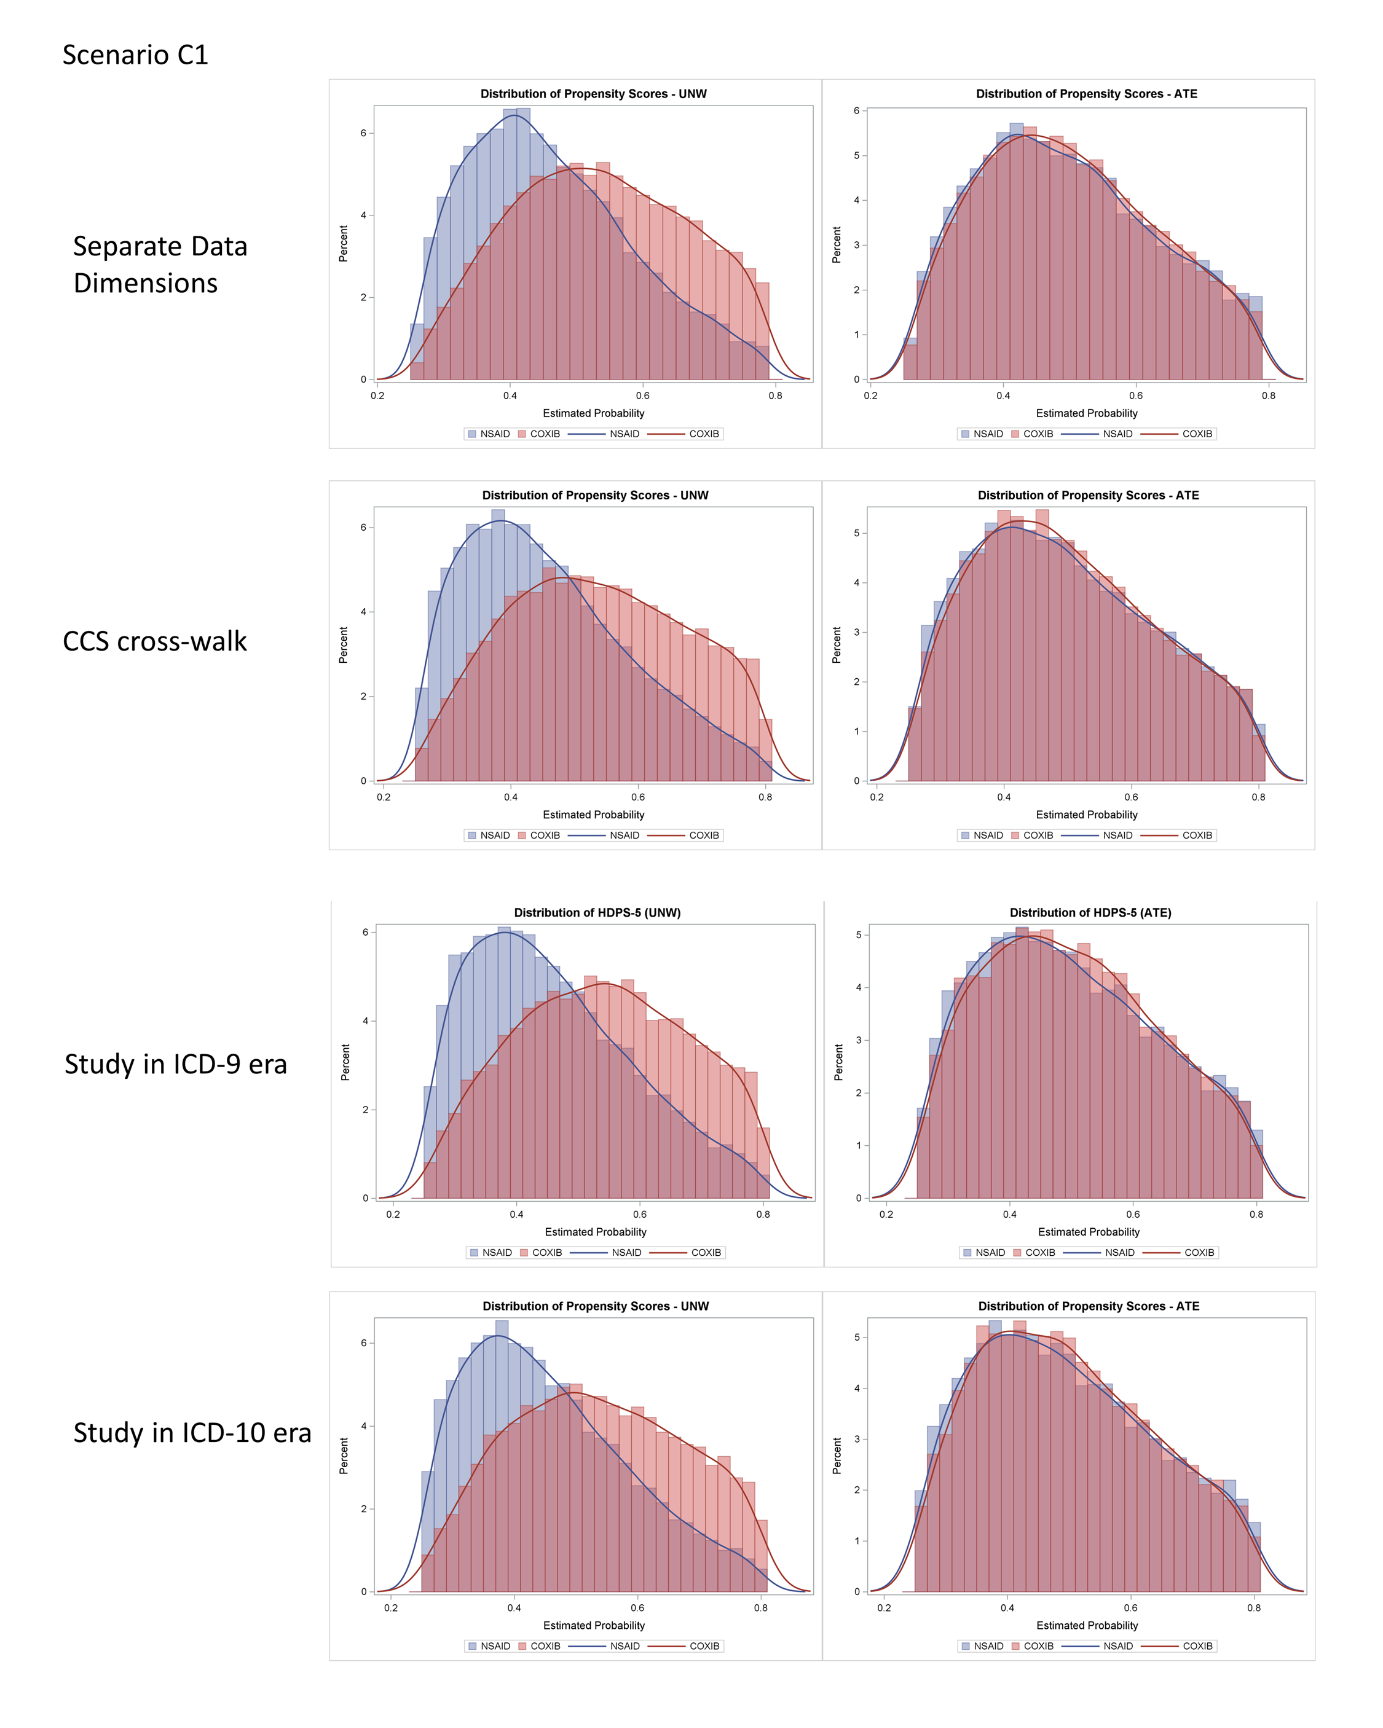


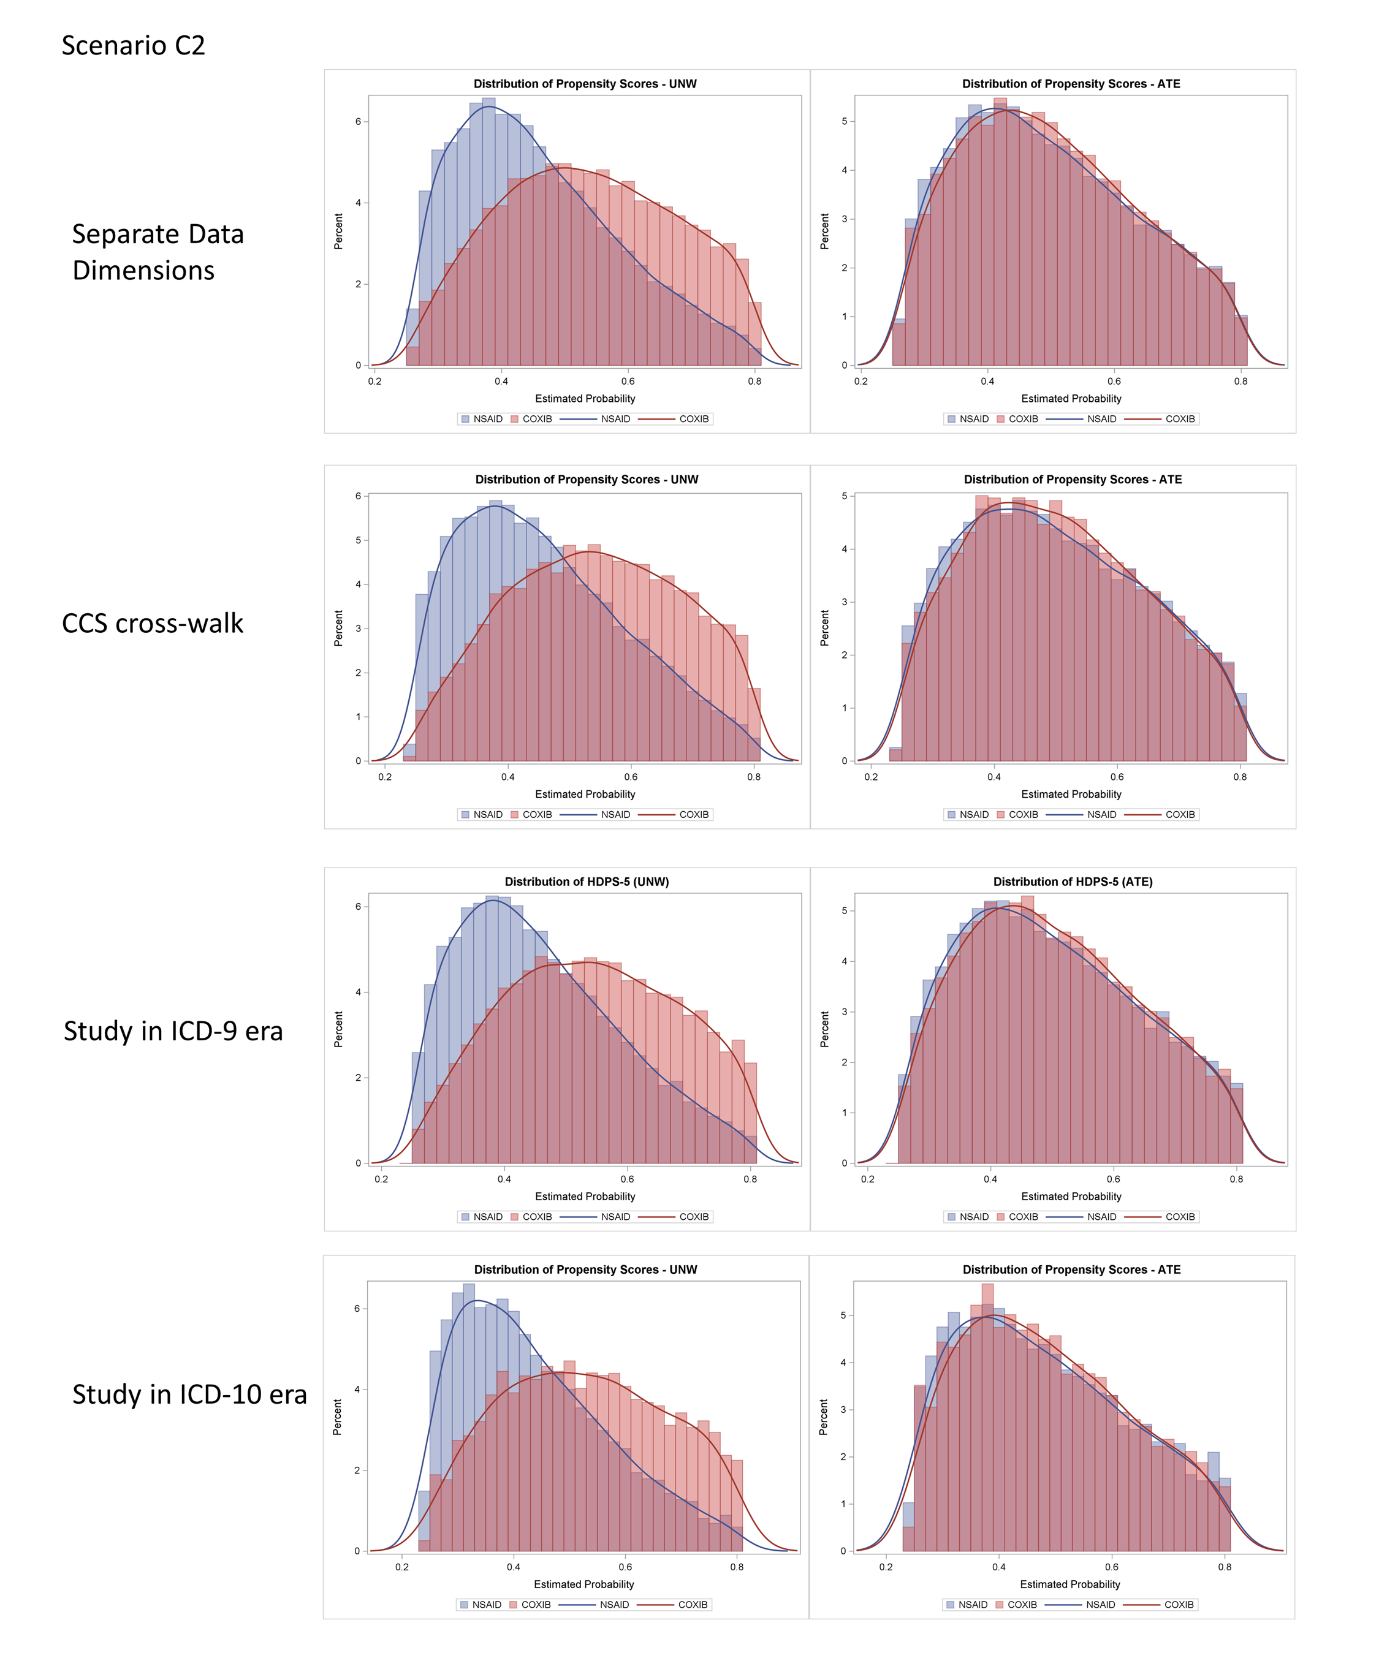


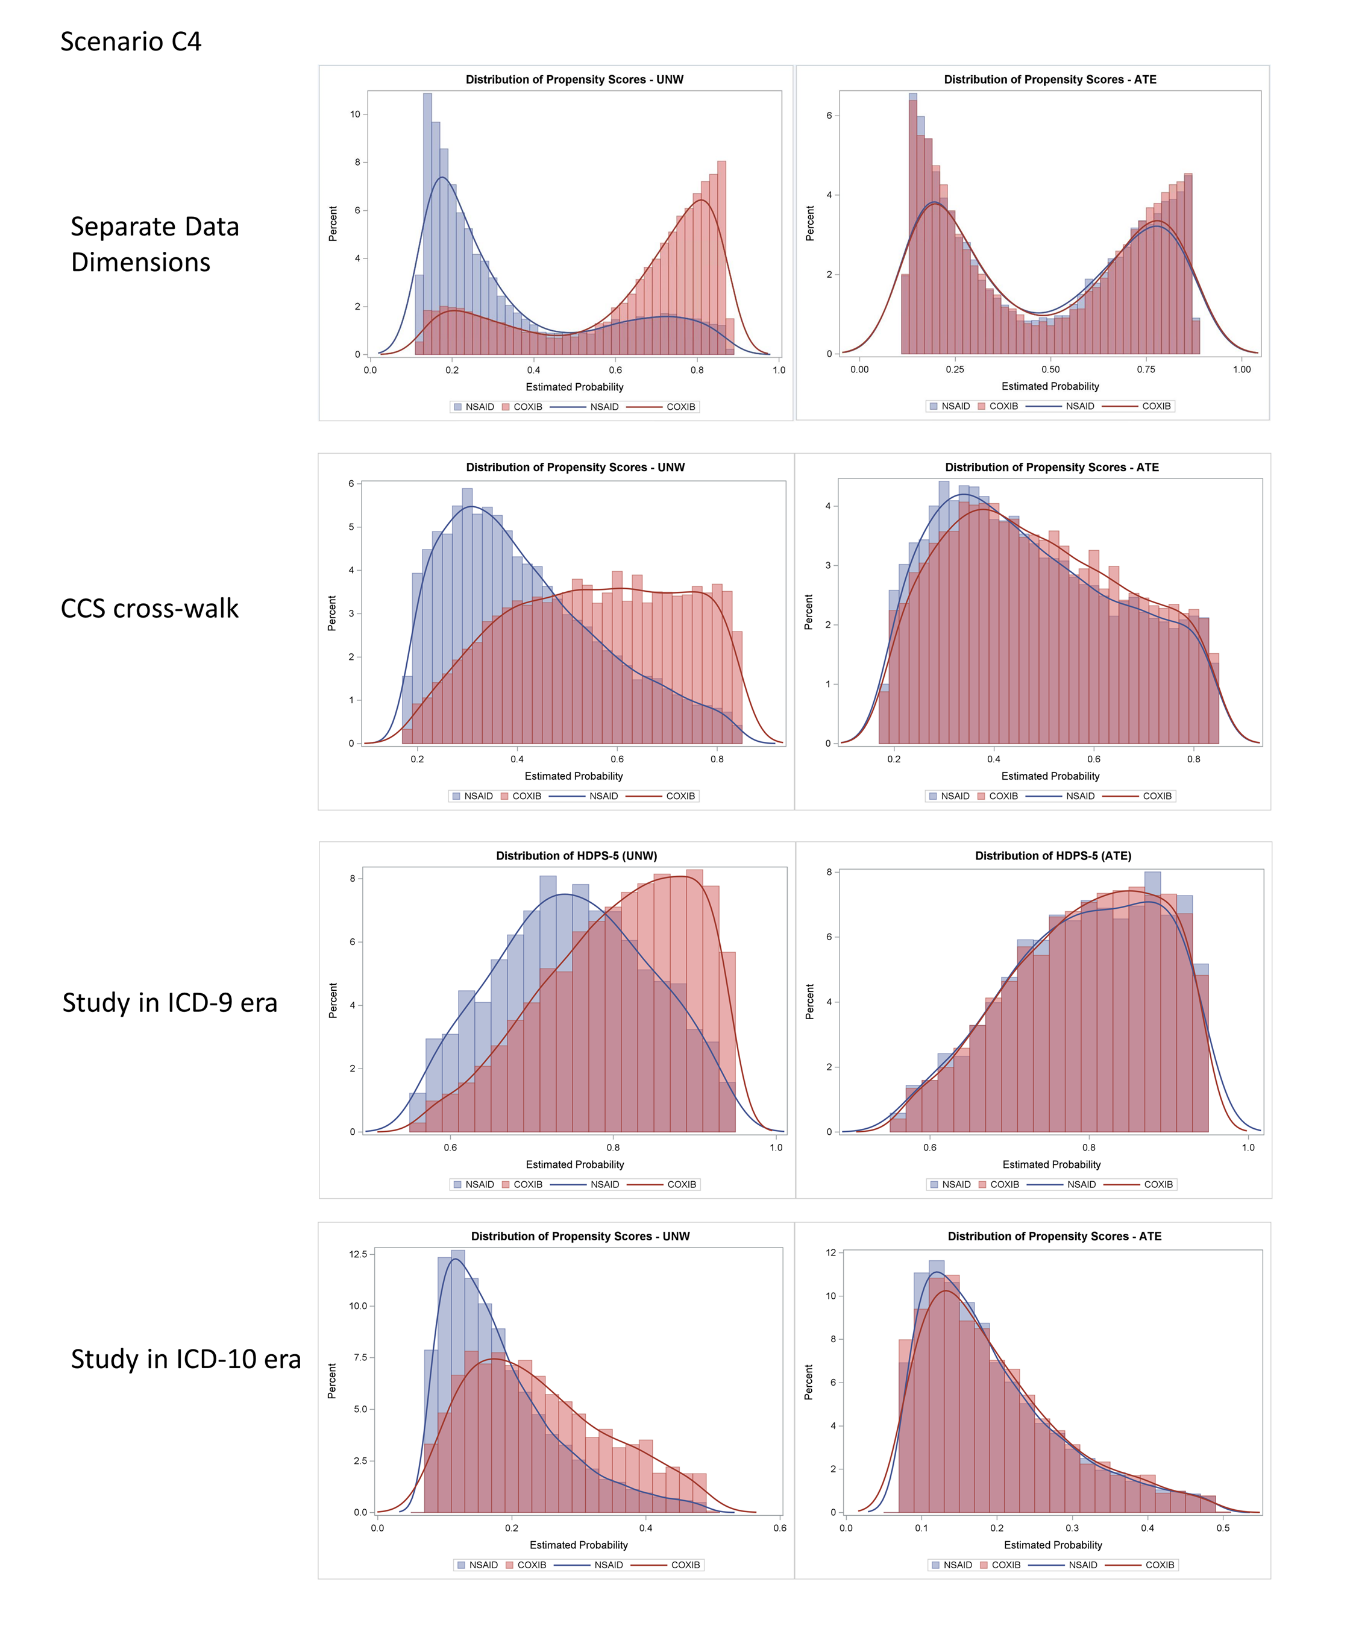


1.4 Role of Prevalence Filter in High-Dimensional Propensity Score Procedure

|  | Scenario 1  (NSAID: N=25,000)  (COXIB: N=25,000) | Scenario 2  (NSAID: N=45,000)  (COXIB: N=5,000) | Scenario 3  (NSAID: N=5,000)  (COXIB: N=45,000) |
| --- | --- | --- | --- |
| Original Sample | 1.21 (1.04-1.41) | 1.18 (0.92-1.51) | 1.27 (0.97-1.67) |
|  |  |  |  |
| Relative Risk – ATE – No Trim |  |  |  |
| Prevalence Filter (N=50) | 1.02 (0.87-1.18) | 1.28 (1.00-1.63) | 1.13 (0.89-1.44) |
| Prevalence Filter (N=100) | 1.01 (0.87-1.18) | 0.92 (0.69-1.21) | 1.23 (0.96-1.57) |
| Prevalence Filter (N=200) | 0.98 (0.84-1.13) | 0.96 (0.73-1.26) | 1.19 (0.92-1.52) |
| Prevalence Filter (N=300) | 1.00 (0.86-1.16) | 1.14 (0.88-1.46) | 1.24 (0.96-1.61) |
| Prevalence Filter (N=400) | 1.00 (0.86-1.16) | 1.05 (0.81-1.36) | 1.34 (1.02-1.74) |
|  |  |  |  |
| Relative Risk – ATE – 5% Trim |  |  |  |
| Prevalence Filter (N=50) | 0.95 (0.81-1.12) | 0.86 (0.63-1.19) | 1.00 (0.76-1.33) |
| Prevalence Filter (N=100) | 0.96 (0.82-1.14) | 0.85 (0.61-1.17) | 0.90 (0.68-1.18) |
| Prevalence Filter (N=200) | 0.92 (0.78-1.08) | 0.82 (0.59-1.14) | 0.73 (0.57-0.95) |
| Prevalence Filter (N=300) | 0.96 (0.81-1.13) | 0.79 (0.57-1.11) | 0.90 (0.68-1.19) |
| Prevalence Filter (N=400) | 0.93 (0.78-1.10) | 0.76 (0.54-1.07) | 0.82 (0.63-1.08) |

All numbers in the table are relative risk (95% confidence interval). Three random samples with different selection patterns were drawn from the parent cohort (2012-2015, ICD-9 era).
